# Supplementary material for: The Impact of Serum Amyloid P-Component on Gene Expression in RAW264.7 Mouse Macrophages
Source: Hindawi journal article supplement (doi:10.1155/2016/9380290), 2016-01-01
Supplement: f1 [file 9380290.f1.pdf]

**Supplementary Table 1. Primers used in this study for quantitative RT-PCR analysis.**

| Symbol        | Gene ID        | Primers                                       | Product |
|---------------|----------------|-----------------------------------------------|---------|
| Edn1          | NM_010104.3    | gctgggtggaaggaaggaaac;agtcaatgtgctcggttg      | 132     |
| Egr1          | NM_007913.5    | ccttcagcacctcaactggt;tcttctgcctctccctt        | 108     |
| Nlrp3         | NM_145827.3    | ccttgacgagcacattgg;cttgggcagcagttcttct        | 101     |
| Il10          | NM_010548.2    | aaataagagcaaggcagtg;gtccagcagactcaatacacac    | 171     |
| Ppp1r3b       | NM_177741.3    | taccagcagcctcagaaga;atgctatcccagacacag        | 141     |
| Unc5b         | NM_029770.2    | ccagactctaccatcagc;gacctcgcgcttaccat          | 153     |
| Pgam2         | NM_018870.3    | gctgagtgagaaggagcag;gtccaaagggtcggtt          | 120     |
| Eef2k         | NM_001267710.1 | aatggctgttctcctcca;atcctgtcggcttcttctg        | 105     |
| Lepr          | NM_001122899.1 | agccacgcaacttctccag;aaaccaaccacctcttct        | 101     |
| 4930528A17Rik | NR_028384.1    | tgctgtgtgagggtgtcaaat;tgggtgaaactgggagtca     | 154     |
| A630075F10Rik | NR_033632.1    | caagagaggcaggcaagaag;atggagagtgtgagccaagg     | 137     |
| BC051226      | NR_045146.1    | gtgtgatgaggaagcctgaa;acaatgagaggaggtgggttta   | 165     |
| AA465934      | NR_028363.1    | attgtccctgtccaagactgc;tccaacctgatttctcacct    | 187     |
| 4921508A21Rik | NR_046034.1    | ctggaacctgaactgacaac;tatgtggagagattgctggaga   | 139     |
| Gm11974       | NR_045893.1    | ggctattccgagtcaggta;gtcatccctccacgctgta       | 147     |
| 6330549D23Rik | NR_003619.2    | tggaaggttctccaagatcagt;gtcttcgtgctccctaagtctg | 102     |
| Mir17hg       | NR_029382.1    | tgaagatgccgatttccact;atccagcagcaaacacg        | 186     |
| Bcl           | NR_038088.1    | gggatttagctcagtgtagag;ggttgtgtgtgccagttacc    | 144     |

**Supplementary Table 2.** The complete gene list of differentially expressed genes (fold change > 2 and FDR < 0.05).

| Symbol        | SAP  | Control | log2 ratio | pvalue    | FDR        | Title                                                                |
|---------------|------|---------|------------|-----------|------------|----------------------------------------------------------------------|
| Fbxo5         | 0.01 | 0.41    | -5.36      | 0.0071884 | 0.03263802 | F-box protein 5                                                      |
| Zfp951        | 0.01 | 0.26    | -4.68      | 0.0071884 | 0.0326487  | zinc finger protein 951                                              |
| Ccdc96        | 0.03 | 0.42    | -3.84      | 0.0004479 | 0.00305774 | coiled-coil domain containing 96                                     |
| Pfkfb1        | 0.06 | 0.87    | -3.84      | 0.0004479 | 0.00305924 | 6-phosphofructo-2-kinase /fructose-2,6-biphosphatase 1               |
| Armcx2        | 0.03 | 0.37    | -3.73      | 0.0008518 | 0.00533769 | armadillo repeat containing, X-linked 2                              |
| Mab2113       | 0.03 | 0.33    | -3.49      | 0.0030434 | 0.01594675 | mab-21-like 3 (C. elegans)                                           |
| Fut7          | 0.05 | 0.54    | -3.35      | 0.0057106 | 0.02691448 | fucosyltransferase 7                                                 |
| Arhgef19      | 0.03 | 0.28    | -3.20      | 0.0106515 | 0.04584291 | Rho guanine nucleotide exchange factor (GEF) 19                      |
| Gpr19         | 0.10 | 0.62    | -2.61      | 0.006566  | 0.03027786 | G protein-coupled receptor 19                                        |
| Atl1          | 0.19 | 1.06    | -2.52      | 2.99E-05  | 0.00027365 | atlastin GTPase 1                                                    |
| 6330549D23Rik | 0.07 | 0.41    | -2.49      | 0.011622  | 0.04931605 | RIKEN cDNA 6330549D23 gene                                           |
| Usp27x        | 0.10 | 0.53    | -2.44      | 0.0022189 | 0.01214902 | ubiquitin specific peptidase 27, X chromosome                        |
| Apba1         | 0.06 | 0.30    | -2.28      | 0.001301  | 0.0076909  | amyloid beta (A4) precursor protein binding, family A, member 1      |
| Pgam2         | 0.35 | 1.53    | -2.15      | 0.0112975 | 0.04821917 | phosphoglycerate mutase 2                                            |
| Fmo5          | 0.06 | 0.26    | -2.15      | 0.0112975 | 0.048234   | flavin containing monooxygenase 5                                    |
| Zfp677        | 0.14 | 0.62    | -2.12      | 0.0037355 | 0.01884049 | zinc finger protein 677                                              |
| Atr           | 0.05 | 0.22    | -2.12      | 0.0037355 | 0.01883364 | ataxia telangiectasia and Rad3 related                               |
| Slc2a13       | 0.24 | 0.99    | -2.05      | 3.70E-08  | 5.79E-07   | solute carrier family 2 (facilitated glucose transporter), member 13 |
| Fancm         | 0.07 | 0.27    | -2.03      | 0.0020993 | 0.01159502 | Fanconi anemia, complementation group M                              |
| Hoxa1         | 0.21 | 0.86    | -2.03      | 0.0020993 | 0.0115858  | homeobox A1                                                          |
| Eif3j2        | 0.17 | 0.66    | -1.94      | 0.0103715 | 0.04480436 | eukaryotic translation initiation factor 3, subunit J2               |
| Zfp239        | 0.26 | 0.98    | -1.92      | 0.0006626 | 0.00428332 | zinc finger protein 239                                              |
| Mir17hg       | 0.40 | 1.50    | -1.90      | 0.0001302 | 0.00101941 | Mir17 host gene 1 (non-protein coding)                               |
| Zscan22       | 0.56 | 2.08    | -1.89      | 1.88E-06  | 2.21E-05   | zinc finger and SCAN domain containing 22                            |
| Tsku          | 0.19 | 0.70    | -1.88      | 0.0056785 | 0.02678156 | tsukushi                                                             |
| Glrp1         | 0.27 | 0.93    | -1.80      | 0.0092166 | 0.04052142 | glutamine repeat protein 1                                           |

|               |       |       |       |           |            |                                                                      |
|---------------|-------|-------|-------|-----------|------------|----------------------------------------------------------------------|
| Fancf         | 0.62  | 2.14  | -1.80 | 0.0001889 | 0.00142144 | Fanconi anemia, complementation group F                              |
| Tnfsf15       | 0.09  | 0.31  | -1.80 | 0.0092166 | 0.04050859 | tumor necrosis factor (ligand) superfamily, member 15                |
| Zfp719        | 0.33  | 1.13  | -1.76 | 3.90E-06  | 4.35E-05   | zinc finger protein 719                                              |
| Thbd          | 1.04  | 3.50  | -1.75 | 2.21E-12  | 5.65E-11   | thrombomodulin                                                       |
| E430018J23Rik | 0.39  | 1.28  | -1.73 | 0.001529  | 0.00884655 | RIKEN cDNA E430018J23 gene                                           |
| Pdss1         | 0.51  | 1.69  | -1.73 | 0.001529  | 0.00885024 | prenyl (solanesyl) diphosphate synthase, subunit 1                   |
| Eya4          | 0.15  | 0.49  | -1.69 | 0.0080265 | 0.03590344 | eyes absent 4 homolog (Drosophila)                                   |
| Ppp1r3b       | 0.44  | 1.44  | -1.69 | 3.08E-06  | 3.50E-05   | protein phosphatase 1, regulatory (inhibitor) subunit 3B             |
| Lrrc14        | 1.15  | 3.61  | -1.65 | 9.17E-08  | 1.34E-06   | leucine rich repeat containing 14                                    |
| Tlr13         | 0.81  | 2.50  | -1.63 | 4.88E-09  | 8.49E-08   | toll-like receptor 13                                                |
| G630090E17Rik | 0.47  | 1.44  | -1.61 | 0.0037807 | 0.0190062  | RIKEN cDNA G630090E17 gene                                           |
| Magi3         | 0.17  | 0.53  | -1.61 | 0.0006426 | 0.00417748 | membrane associated guanylate kinase, WW and PDZ domain containing 3 |
| Gpr85         | 0.49  | 1.51  | -1.61 | 0.0001127 | 0.00089251 | G protein-coupled receptor 85                                        |
| Egr1          | 2.62  | 7.98  | -1.61 | 9.82E-20  | 4.03E-18   | early growth response 1                                              |
| Zfp41         | 0.33  | 1.00  | -1.57 | 0.0005532 | 0.00368102 | zinc finger protein 41                                               |
| F3            | 14.47 | 42.85 | -1.57 | 9.15E-59  | 1.01E-56   | coagulation factor III                                               |
| Gdpgp1        | 0.53  | 1.58  | -1.56 | 2.67E-05  | 0.00024579 | GDP-D-glucose phosphorylase 1                                        |
| Flrt3         | 3.66  | 10.79 | -1.56 | 3.19E-36  | 2.13E-34   | fibronectin leucine rich transmembrane protein 3                     |
| Otud1         | 0.66  | 1.94  | -1.55 | 8.39E-05  | 0.0006879  | OTU domain containing 1                                              |
| 2610015P09Rik | 0.20  | 0.59  | -1.54 | 0.0107472 | 0.04621154 | RIKEN cDNA 2610015P09 gene                                           |
| Gfpt2         | 0.42  | 1.18  | -1.49 | 0.0012919 | 0.00764328 | glutamine fructose-6-phosphate transaminase 2                        |
| Naif1         | 0.46  | 1.28  | -1.47 | 0.0006117 | 0.0040008  | nuclear apoptosis inducing factor 1                                  |
| Lin52         | 1.27  | 3.48  | -1.46 | 3.37E-06  | 3.81E-05   | lin-52 homolog (C. elegans)                                          |
| Unc5b         | 0.46  | 1.24  | -1.42 | 7.46E-06  | 7.71E-05   | unc-5 homolog B (C. elegans)                                         |
| Mblac2        | 0.27  | 0.71  | -1.41 | 0.006327  | 0.02933177 | metallo-beta-lactamase domain containing 2                           |
| Fastkd5       | 0.50  | 1.28  | -1.37 | 0.0011513 | 0.00690301 | FAST kinase domains 5                                                |
| Zfp27         | 0.41  | 1.06  | -1.35 | 0.0020446 | 0.01133326 | zinc finger protein 27                                               |
| Zbtb1         | 0.68  | 1.73  | -1.35 | 2.39E-05  | 0.00022221 | zinc finger and BTB domain containing 1                              |
| Neu3          | 0.69  | 1.76  | -1.35 | 0.0001035 | 0.00082741 | neuraminidase 3                                                      |
| Zfp334        | 0.21  | 0.53  | -1.35 | 0.0094876 | 0.04150256 | zinc finger protein 334                                              |
| Gm10509       | 0.68  | 1.70  | -1.33 | 0.0036374 | 0.01842616 | zinc finger protein 51 pseudogene                                    |

|               |      |       |       |           |            |                                                                                              |
|---------------|------|-------|-------|-----------|------------|----------------------------------------------------------------------------------------------|
| Slc35a5       | 0.97 | 2.44  | -1.33 | 3.77E-07  | 4.97E-06   | solute carrier family 35, member A5                                                          |
| Tefm          | 0.88 | 2.21  | -1.33 | 0.0078474 | 0.03523823 | transcription elongation factor, mitochondrial                                               |
| Mars2         | 0.40 | 1.00  | -1.33 | 0.0078474 | 0.03524963 | methionine-tRNA synthetase 2 (mitochondrial)                                                 |
| Acot11        | 0.46 | 1.15  | -1.32 | 6.07E-05  | 0.00051694 | acyl-CoA thioesterase 11                                                                     |
| Yars2         | 1.05 | 2.62  | -1.32 | 0.0014159 | 0.00829249 | tyrosyl-tRNA synthetase 2 (mitochondrial)                                                    |
| Cd97          | 0.39 | 0.95  | -1.30 | 0.0064847 | 0.02997257 | CD97 antigen                                                                                 |
| Hdgfrp3       | 0.57 | 1.40  | -1.30 | 8.26E-06  | 8.44E-05   | hepatoma-derived growth factor, related protein 3                                            |
| Zfp945        | 0.28 | 0.69  | -1.29 | 0.0009775 | 0.00601383 | zinc finger protein 945                                                                      |
| Nsun3         | 1.40 | 3.41  | -1.29 | 0.0009775 | 0.0060165  | NOL1/NOP2/Sun domain family member 3                                                         |
| Eef2k         | 0.34 | 0.84  | -1.28 | 0.0003859 | 0.0026833  | eukaryotic elongation factor-2 kinase                                                        |
| Ncapd3        | 0.40 | 0.97  | -1.28 | 0.0003859 | 0.00268196 | non-SMC condensin II complex, subunit D3                                                     |
| Tnfrsf8       | 1.06 | 2.57  | -1.28 | 0.0020715 | 0.01147332 | tumor necrosis factor receptor superfamily, member 8                                         |
| Pdpr          | 1.22 | 2.94  | -1.26 | 8.32E-06  | 8.48E-05   | pyruvate dehydrogenase phosphatase regulatory subunit                                        |
| 2310015A10Rik | 0.32 | 0.77  | -1.25 | 0.0036486 | 0.01847605 | RIKEN cDNA 2310015A10 gene                                                                   |
| Tlr3          | 0.43 | 1.03  | -1.25 | 0.0014199 | 0.00830853 | toll-like receptor 3                                                                         |
| Usp31         | 0.51 | 1.21  | -1.24 | 1.11E-07  | 1.60E-06   | ubiquitin specific peptidase 31                                                              |
| Exoc8         | 0.41 | 0.95  | -1.22 | 8.76E-05  | 0.00071612 | exocyst complex component 8                                                                  |
| Galnt3        | 1.70 | 3.88  | -1.19 | 3.65E-08  | 5.71E-07   | UDP-N-acetyl-alpha-D-galactosamine:polypeptide N-acetylgalactosaminyltransferase 3           |
| Pdcd11        | 1.19 | 2.71  | -1.19 | 3.58E-09  | 6.31E-08   | programmed cell death 11                                                                     |
| Ercc6l2       | 0.49 | 1.11  | -1.19 | 0.000312  | 0.00221274 | excision repair cross-complementing rodent repair deficiency, complementation group 6 like 2 |
| Lipn          | 0.90 | 2.06  | -1.19 | 0.0113393 | 0.04833838 | lipase, family member N                                                                      |
| Areg          | 2.26 | 5.16  | -1.19 | 0.000312  | 0.00221161 | amphiregulin                                                                                 |
| Mir22hg       | 9.05 | 20.53 | -1.18 | 2.22E-18  | 8.37E-17   | Mir22 host gene (non-protein coding)                                                         |
| Kbtbd7        | 0.76 | 1.72  | -1.18 | 5.89E-05  | 0.00050212 | kelch repeat and BTB (POZ) domain containing 7                                               |
| Fadd          | 1.24 | 2.79  | -1.17 | 4.88E-05  | 0.00042247 | Fas (TNFRSF6)-associated via                                                                 |

|          |        |         |       |           |            |                                                                       |
|----------|--------|---------|-------|-----------|------------|-----------------------------------------------------------------------|
|          |        |         |       |           |            | death domain                                                          |
| Ahrr     | 0.55   | 1.24    | -1.17 | 0.0005357 | 0.00357479 | aryl-hydrocarbon receptor repressor                                   |
| Ppfbp2   | 0.54   | 1.22    | -1.17 | 0.0019933 | 0.01111112 | PTPRF interacting protein, binding protein 2 (liprin beta 2)          |
| Agk      | 1.22   | 2.73    | -1.16 | 0.0004425 | 0.00303011 | acylglycerol kinase                                                   |
| Rpgrip1l | 0.24   | 0.54    | -1.16 | 0.0062316 | 0.02895702 | Rpgrip1-like                                                          |
| Cd84     | 0.47   | 1.06    | -1.16 | 0.0062316 | 0.02894733 | CD84 antigen                                                          |
| Hdhd3    | 2.09   | 4.66    | -1.16 | 0.0013523 | 0.00795682 | haloacid dehalogenase-like hydrolase domain containing 3              |
| Eid2     | 1.53   | 3.37    | -1.14 | 0.0034433 | 0.01762279 | EP300 interacting inhibitor of differentiation 2                      |
| Zfp322a  | 0.43   | 0.93    | -1.13 | 0.0028286 | 0.01494496 | zinc finger protein 322A                                              |
| Gcnt2    | 1.43   | 3.14    | -1.13 | 1.96E-07  | 2.72E-06   | glucosaminyl (N-acetyl) transferase 2, I-branching enzyme             |
| Slc16a9  | 1.41   | 3.08    | -1.13 | 3.55E-06  | 3.99E-05   | solute carrier family 16 (monocarboxylic acid transporters), member 9 |
| Ubox5    | 0.56   | 1.23    | -1.13 | 0.0023247 | 0.01265873 | U box domain containing 5                                             |
| Mt1      | 475.98 | 1036.26 | -1.12 | 1.05E-257 | 9.70E-255  | metallothionein 1                                                     |
| Zfp518a  | 0.35   | 0.76    | -1.12 | 0.0015724 | 0.00906369 | zinc finger protein 518A                                              |
| Dna2     | 1.19   | 2.59    | -1.12 | 5.96E-06  | 6.34E-05   | DNA replication helicase 2 homolog (yeast)                            |
| Sacs     | 0.50   | 1.08    | -1.12 | 0.0088686 | 0.03921509 | sacsin                                                                |
| Krt23    | 1.67   | 3.62    | -1.11 | 0.0010654 | 0.00647713 | keratin 23                                                            |
| Ofd1     | 0.45   | 0.96    | -1.10 | 0.0048656 | 0.02361367 | oral-facial-digital syndrome 1 gene homolog (human)                   |
| Ppp1r10  | 1.21   | 2.59    | -1.10 | 5.69E-06  | 6.09E-05   | protein phosphatase 1, regulatory subunit 10                          |
| Mrc1     | 0.78   | 1.68    | -1.10 | 4.31E-05  | 0.00037855 | mannose receptor, C type 1                                            |
| Zfp212   | 1.50   | 3.17    | -1.08 | 7.23E-05  | 0.00060252 | Zinc finger protein 212                                               |
| Edn1     | 55.87  | 118.45  | -1.08 | 4.33E-113 | 1.13E-110  | endothelin 1                                                          |
| Vrk1     | 0.77   | 1.63    | -1.08 | 0.0008308 | 0.00522264 | vaccinia related kinase 1                                             |
| Rif1     | 0.87   | 1.84    | -1.08 | 9.33E-08  | 1.36E-06   | Rap1 interacting factor 1 homolog (yeast)                             |
| Mt2      | 861.44 | 1811.87 | -1.07 | 0         | 0          | metallothionein 2                                                     |
| Nlrp3    | 6.57   | 13.82   | -1.07 | 1.36E-23  | 6.54E-22   | NLR family, pyrin domain containing 3                                 |
| Zfp955b  | 0.55   | 1.15    | -1.07 | 0.0102229 | 0.04432806 | zinc finger protein 955B                                              |
| C2cd3    | 0.92   | 1.94    | -1.07 | 1.86E-07  | 2.59E-06   | C2 calcium-dependent domain containing 3                              |
| Bcl2l12  | 1.92   | 4.01    | -1.07 | 0.0055899 | 0.02643537 | BCL2-like 12 (proline rich)                                           |
| Tbcc     | 2.32   | 4.86    | -1.06 | 6.83E-05  | 0.00057285 | tubulin-specific chaperone C                                          |

|               |       |       |       |           |            |                                                                       |
|---------------|-------|-------|-------|-----------|------------|-----------------------------------------------------------------------|
| Rrm2b         | 1.50  | 3.13  | -1.06 | 5.38E-07  | 6.89E-06   | ribonucleotide reductase M2 B (TP53 inducible)                        |
| Il10          | 37.43 | 77.64 | -1.05 | 1.50E-40  | 1.19E-38   | interleukin 10                                                        |
| Zc3h4         | 1.16  | 2.41  | -1.05 | 4.21E-07  | 5.47E-06   | zinc finger CCCH-type containing 4                                    |
| Zbtb39        | 0.82  | 1.70  | -1.05 | 3.00E-05  | 0.00027402 | zinc finger and BTB domain containing 39                              |
| Homer1        | 1.60  | 3.29  | -1.04 | 3.28E-07  | 4.36E-06   | homer homolog 1 (Drosophila)                                          |
| Zfp251        | 1.01  | 2.06  | -1.03 | 0.0004952 | 0.00333473 | zinc finger protein 251                                               |
| Lig4          | 0.64  | 1.31  | -1.03 | 0.0028724 | 0.01514776 | ligase IV, DNA, ATP-dependent                                         |
| Calhm2        | 1.07  | 2.19  | -1.03 | 0.0063654 | 0.02949009 | calcium homeostasis modulator 2                                       |
| Daglb         | 0.61  | 1.24  | -1.03 | 0.009521  | 0.04163563 | diacylglycerol lipase, beta                                           |
| Naip6         | 0.42  | 0.86  | -1.03 | 0.001937  | 0.01083639 | NLR family, apoptosis inhibitory protein 6                            |
| Kctd21        | 1.44  | 2.94  | -1.03 | 0.0001288 | 0.0010094  | potassium channel tetramerisation domain containing 21                |
| Oxsm          | 0.67  | 1.36  | -1.03 | 0.003501  | 0.01784561 | 3-oxoacyl-ACP synthase, mitochondrial                                 |
| Mlh3          | 0.77  | 1.57  | -1.03 | 0.000156  | 0.00119749 | mutL homolog 3 (E coli)                                               |
| Taf1c         | 0.71  | 1.44  | -1.03 | 0.0052115 | 0.02496896 | TATA box binding protein (Tbp)-associated factor, RNA polymerase I, C |
| Klhl42        | 0.30  | 0.62  | -1.03 | 0.009521  | 0.04162251 | kelch-like 42                                                         |
| Styx          | 1.23  | 2.50  | -1.03 | 2.32E-05  | 0.00021686 | serine/threonine/tyrosine interaction protein                         |
| Zfp319        | 2.82  | 5.74  | -1.02 | 2.98E-10  | 6.00E-09   | zinc finger protein 319                                               |
| Ubiad1        | 2.15  | 4.34  | -1.02 | 3.96E-06  | 4.39E-05   | UbiA prenyltransferase domain containing 1                            |
| Kin           | 3.26  | 6.57  | -1.01 | 0.00012   | 0.000944   | antigenic determinant of rec-A protein                                |
| Gle1          | 1.07  | 2.14  | -1.01 | 0.0010002 | 0.00612102 | GLE1 RNA export mediator (yeast)                                      |
| Eif4ebp3      | 2.72  | 5.47  | -1.01 | 0.0014775 | 0.00859884 | eukaryotic translation initiation factor 4E binding protein 3         |
| Dis3          | 0.76  | 1.52  | -1.00 | 0.0026625 | 0.01423007 | DIS3 mitotic control homolog (S. cerevisiae)                          |
| Tmem177       | 0.79  | 1.58  | -1.00 | 0.0039537 | 0.01975427 | transmembrane protein 177                                             |
| 4930528A17Rik | 0.54  | 0.01  | 5.76  | 0.0005525 | 0.00367819 | RIKEN cDNA 4930528A17 gene                                            |
| Mir1938       | 14.62 | 1.07  | 3.78  | 0.0005999 | 0.00394471 | microRNA 1938                                                         |
| Snord14e      | 14.92 | 1.17  | 3.67  | 0.0011178 | 0.00673414 | small nucleolar RNA, C/D box 14E                                      |
| A630075F10Rik | 0.71  | 0.11  | 2.67  | 0.004743  | 0.02308295 | RIKEN cDNA A630075F10 gene                                            |
| Rn7sk         | 11.64 | 1.93  | 2.59  | 1.32E-06  | 1.58E-05   | RNA, 7SK, nuclear                                                     |

|               |       |       |      |           |            |                                                                |
|---------------|-------|-------|------|-----------|------------|----------------------------------------------------------------|
| Scrn2         | 0.82  | 0.14  | 2.56 | 0.0082938 | 0.03696805 | secernin 2                                                     |
| Hspa1b        | 3.49  | 0.61  | 2.52 | 1.70E-14  | 5.18E-13   | heat shock protein 1B                                          |
| Cenpf         | 0.16  | 0.03  | 2.47 | 0.0017439 | 0.00988388 | centromere protein F                                           |
| Gadd45g       | 34.30 | 6.51  | 2.40 | 7.15E-48  | 6.66E-46   | growth arrest and DNA-damage<br>-inducible 45 gamma            |
| Hspa1a        | 0.93  | 0.19  | 2.29 | 0.0002395 | 0.00175885 | heat shock protein 1A                                          |
| Zfp786        | 0.66  | 0.15  | 2.14 | 0.0030462 | 0.01594928 | zinc finger protein 786                                        |
| Mast1         | 0.47  | 0.11  | 2.11 | 0.0011028 | 0.00666674 | microtubule associated serine<br>/threonine kinase 1           |
| BC051226      | 3.59  | 0.89  | 2.02 | 0.0002433 | 0.00177926 | cDNA sequence BC051226                                         |
| AA465934      | 4.30  | 1.10  | 1.97 | 0.0082667 | 0.03685891 | expressed sequence AA465934                                    |
| Hist1h2ac     | 3.98  | 1.11  | 1.84 | 2.61E-10  | 5.27E-09   | histone cluster 1, H2ac                                        |
| Ltb           | 1.86  | 0.57  | 1.71 | 0.0069562 | 0.03179174 | lymphotoxin B                                                  |
| 4921508A21Rik | 1.93  | 0.60  | 1.69 | 0.0005002 | 0.00336512 | RIKEN cDNA 4921508A21 gene                                     |
| Lepr          | 0.51  | 0.17  | 1.56 | 0.0031397 | 0.01634633 | leptin receptor                                                |
| Bcl           | 64.43 | 22.16 | 1.54 | 2.50E-08  | 3.99E-07   | brain cytoplasmic RNA 1                                        |
| Rn45s         | 10.60 | 3.69  | 1.52 | 4.16E-98  | 9.02E-96   | 45S pre-ribosomal RNA                                          |
| Rogdi         | 2.18  | 0.77  | 1.51 | 0.0027503 | 0.01459826 | rogdi homolog (Drosophila)                                     |
| Cx3cr1        | 2.28  | 0.82  | 1.47 | 5.78E-07  | 7.36E-06   | chemokine (C-X3-C) receptor 1                                  |
| Psrc1         | 2.88  | 1.04  | 1.47 | 0.0001422 | 0.0011028  | proline/serine-rich coiled-coil 1                              |
| Hist1h2ba     | 10.61 | 3.89  | 1.45 | 0.0007056 | 0.00451933 | histone cluster 1, H2ba                                        |
| H2-Ab1        | 3.15  | 1.16  | 1.44 | 0.0012086 | 0.00720299 | histocompatibility 2, class II<br>antigen A, beta 1            |
| Mir703        | 74.74 | 28.37 | 1.40 | 2.69E-06  | 3.09E-05   | microRNA 703                                                   |
| Hist1h4m      | 12.12 | 4.74  | 1.35 | 0.0003946 | 0.00273435 | histone cluster 1, H4m                                         |
| Tnfsf10       | 0.65  | 0.26  | 1.34 | 0.004535  | 0.02223448 | tumor necrosis factor (ligand)<br>superfamily, member 10       |
| Atp6v0c       | 4.90  | 1.95  | 1.33 | 0.0001728 | 0.00131337 | ATPase, H <sup>+</sup> transporting,<br>lysosomal V0 subunit C |
| Hist1h2bg     | 13.93 | 5.55  | 1.33 | 3.68E-06  | 4.13E-05   | histone cluster 1, H2bg                                        |
| 3000002C10Rik | 2.61  | 1.08  | 1.27 | 0.0056251 | 0.02658363 | glyceraldehyde-3-phosphate<br>dehydrogenase pseudogene         |
| Gm11974       | 7.23  | 3.06  | 1.24 | 0.0020219 | 0.01124831 | predicted gene 11974                                           |
| Crybb3        | 4.52  | 2.00  | 1.18 | 0.0048665 | 0.02360968 | crystallin, beta B3                                            |
| Fam72a        | 1.49  | 0.66  | 1.18 | 0.0116295 | 0.04933305 | family with sequence similarity<br>72, member A                |
| Grhl1         | 0.96  | 0.43  | 1.16 | 0.0097646 | 0.04254015 | grainyhead-like 1 (Drosophila)                                 |
| Hist1h4i      | 37.54 | 17.08 | 1.14 | 1.12E-10  | 2.40E-09   | histone cluster 1, H4i                                         |
| Gm6756        | 2.20  | 1.01  | 1.12 | 0.0048635 | 0.02361173 | 3-phosphoglycerate<br>dehydrogenase pseudogene                 |
| Trmt10a       | 1.86  | 0.89  | 1.06 | 0.0003701 | 0.00258755 | tRNA methyltransferase 10A                                     |
| Gm996         | 0.89  | 0.43  | 1.04 | 0.0078977 | 0.03543007 | predicted gene 996                                             |
| Rnu6          | 46.85 | 22.92 | 1.03 | 0.0038964 | 0.01948902 | U6 small nuclear RNA                                           |

|       |      |      |      |           |            |                      |
|-------|------|------|------|-----------|------------|----------------------|
| Cenpq | 2.97 | 1.48 | 1.01 | 0.0090859 | 0.04001042 | centromere protein Q |
|-------|------|------|------|-----------|------------|----------------------|
